# Supplementary material for: Selective sorting of microRNAs into exosomes by phase-separated YBX1 condensates
Source: eLife journal article supplement (doi:10.7554/elife.71982), 2021-11-12
Supplement: fig3-figsupp2-data1 [file Uncropped SDS-PAGE corresponding to Figure 3-figure supplement 2.pdf › Figure 3-figure supplement 2-source data 1/Uncropped SDS-PAGE corresponding to Figure 3-figure supplement 2.pdf]

## Figure 3- figure supplement 2D

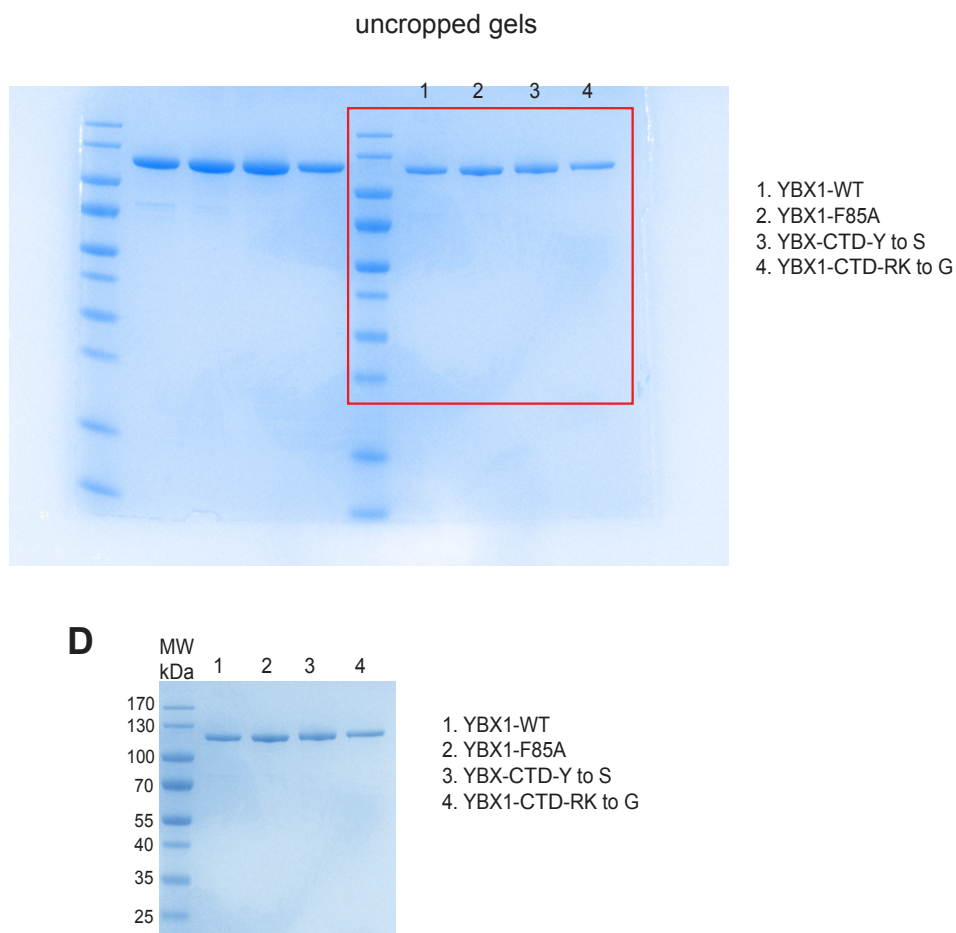

Figure 3- figure supplement 2D. SDS-PAGE of YBX1 wild-type and variants tagged with 6xHis-MBP-mGFP.
