# Supplementary material for: Selective sorting of microRNAs into exosomes by phase-separated YBX1 condensates
Source: eLife journal article supplement (doi:10.7554/elife.71982), 2021-11-12
Supplement: fig4-data2 [file elife-71982-fig4-data2-v2.zip]

Figure 4D

uncropped blots

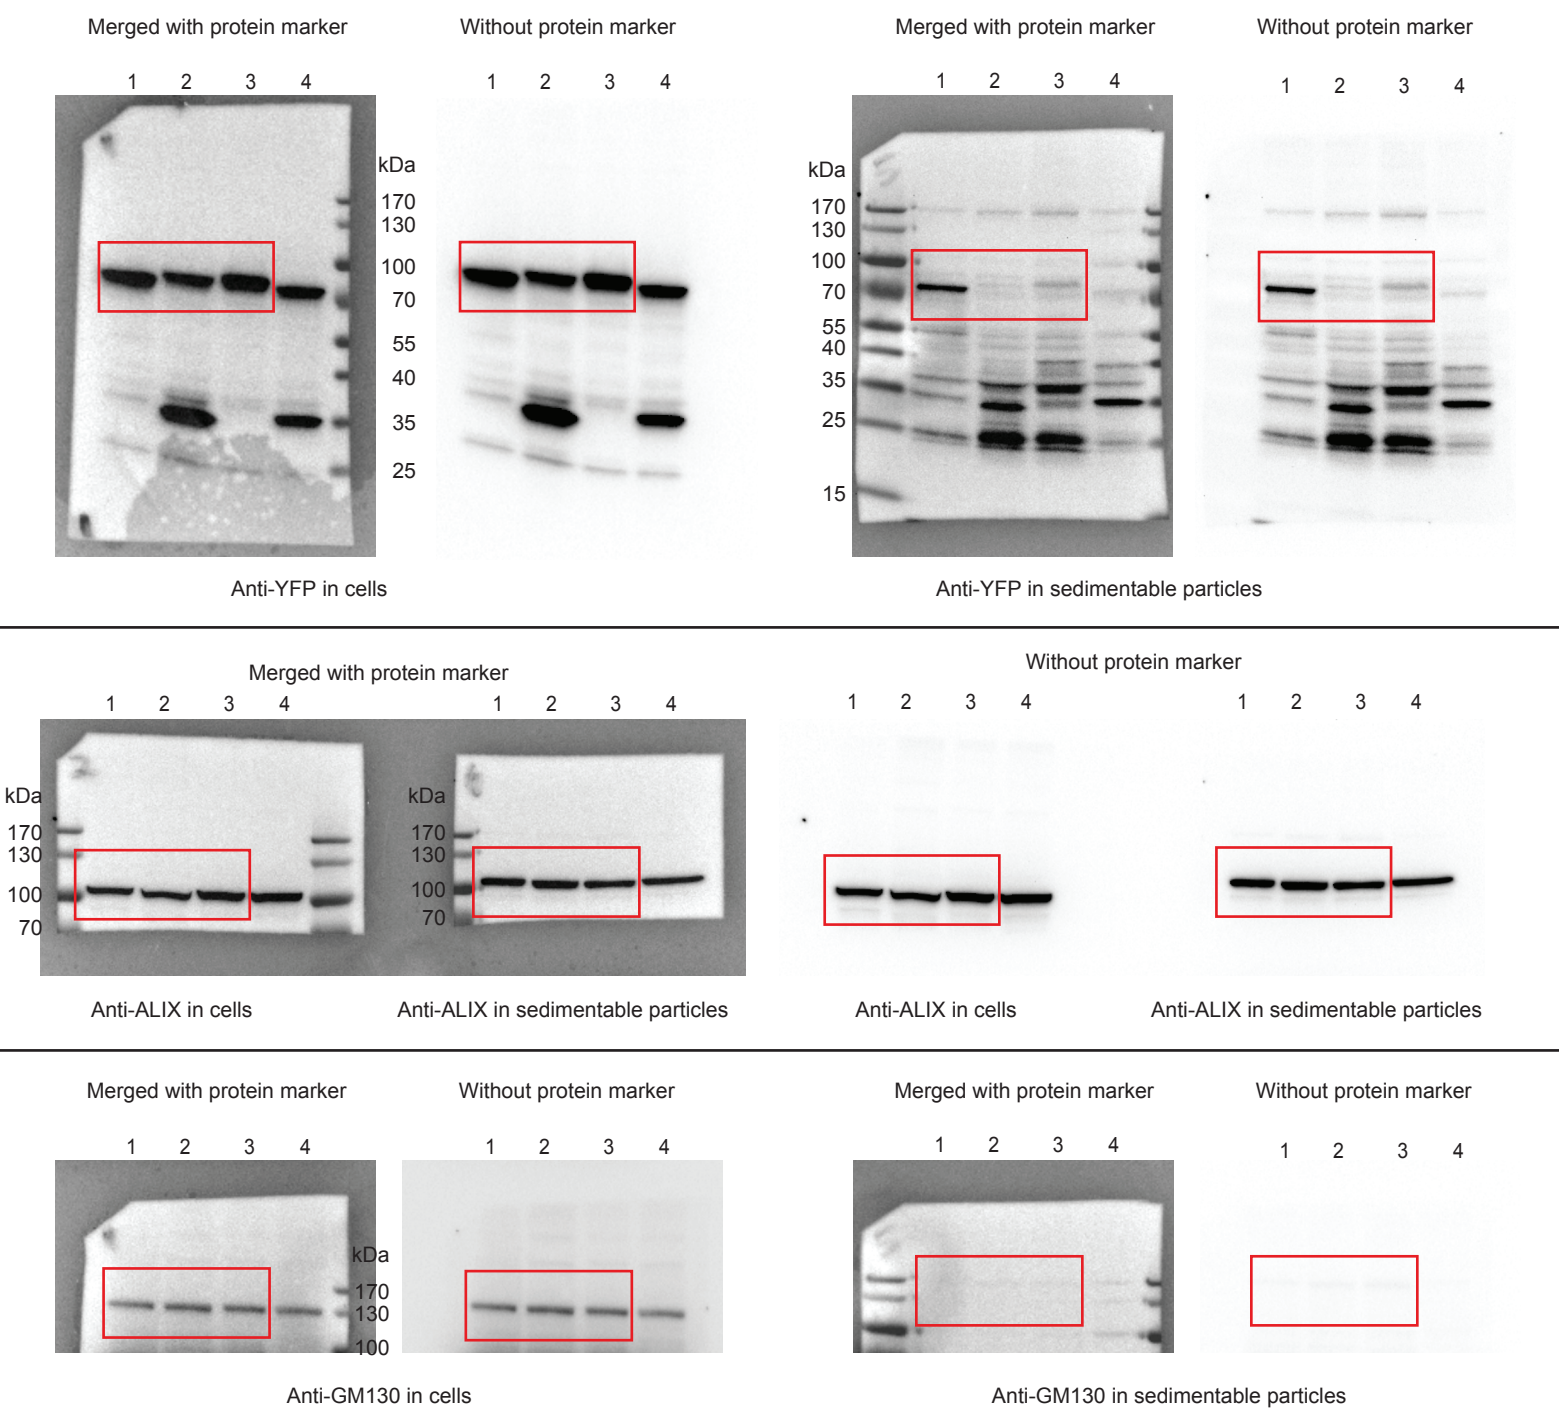

Lane 1:  $\Delta$ YBX1, YFP-YBX1-WT,  
Lane 2:  $\Delta$ YBX1, YFP-YBX1-LCD-Y to S,  
Lane 3:  $\Delta$ YBX1, YFP-YBX1-LCD-RK to G,  
Lane 4:  $\Delta$ YBX1, YFP-YBX1-F85A.

Lines 1, 2, and 3 were used in the Figure 4D

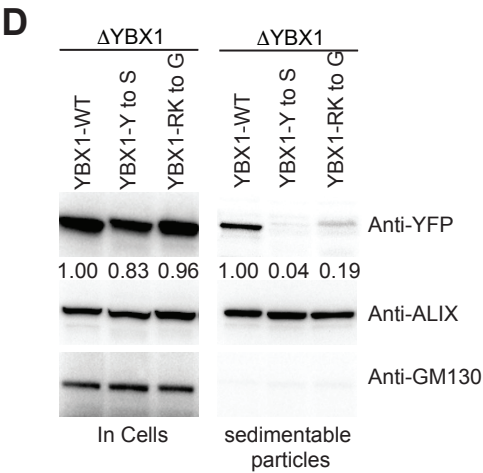

Figure 4D. IDR-driven YBX1 phase separation is required for YBX1 secretion in EVs.
