# Supplementary material for: Selective sorting of microRNAs into exosomes by phase-separated YBX1 condensates
Source: eLife journal article supplement (doi:10.7554/elife.71982), 2021-11-12
Supplement: fig4-data3 [file elife-71982-fig4-data3-v2.zip]

Figure 4E

uncropped blots

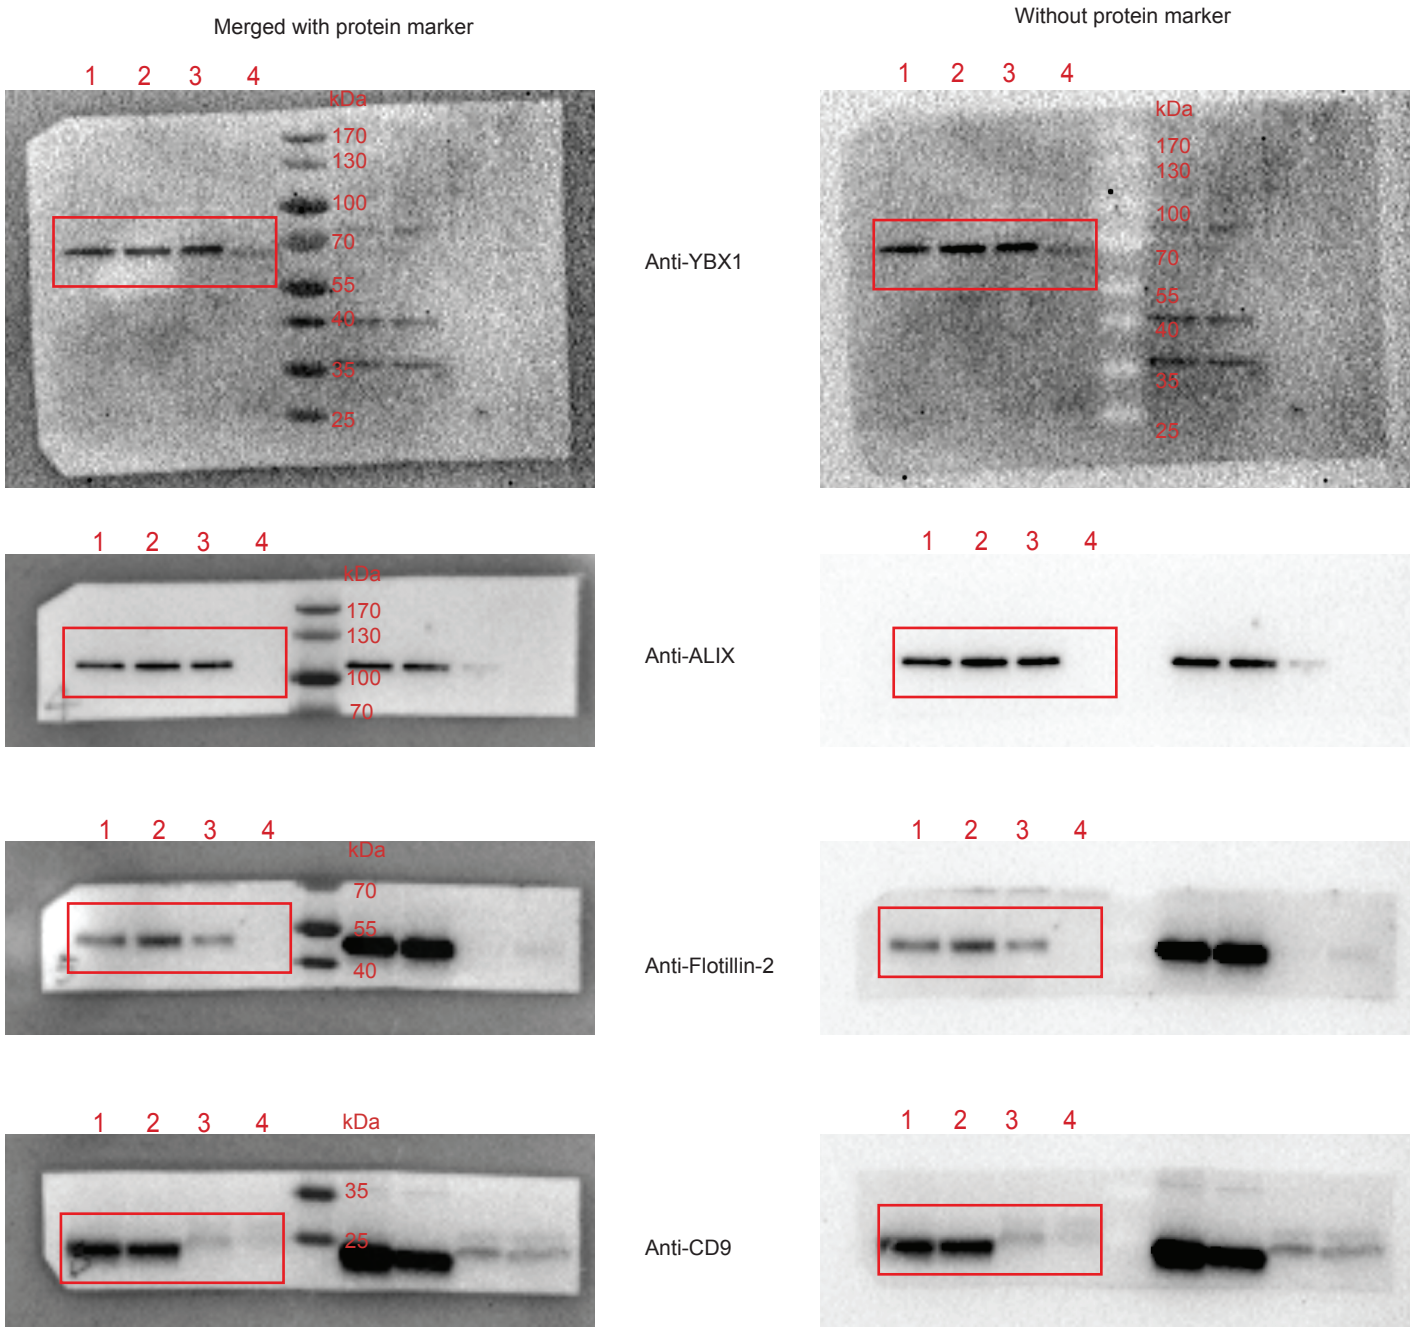

Lane 1: untreated,  
Lane 2: treated with TX-100,  
Lane 3: treated with ProK,  
Lane 4: treated with both TX-100 and ProK

Lines 1, 2, 3 and 4 were used in the Figure 4E.

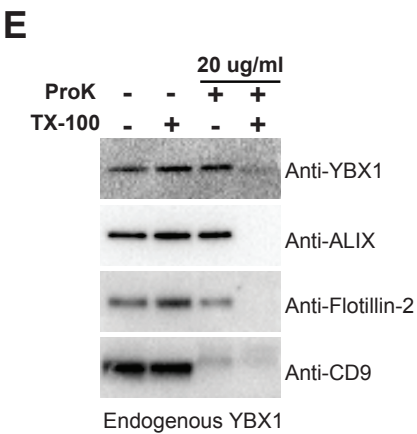

Figure 4E. Proteinase K protection assay on high-speed pellet fractions.
