# Supplementary material for: Selective sorting of microRNAs into exosomes by phase-separated YBX1 condensates
Source: eLife journal article supplement (doi:10.7554/elife.71982), 2021-11-12
Supplement: fig4-data4 [file elife-71982-fig4-data4-v2.zip]

**uncropped blots**

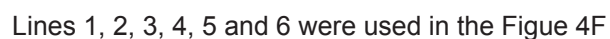

**F**

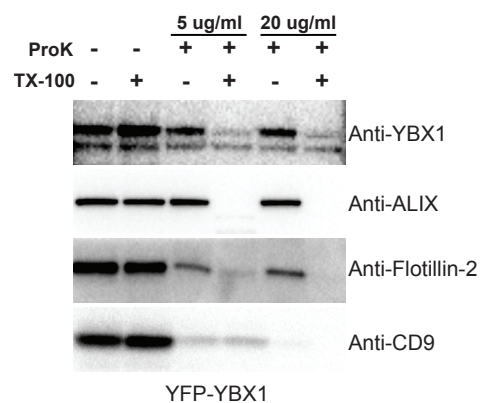

Figure 4F. Proteinase K protection assay on high-speed pellet fractions from U2OS cells expressing YFP-YBX1.
