# Supplementary material for: Selective sorting of microRNAs into exosomes by phase-separated YBX1 condensates
Source: eLife journal article supplement (doi:10.7554/elife.71982), 2021-11-12
Supplement: fig4-data6 [file Uncropped Western blot images corresponding to Figure 4K.pdf › Figure 4-source data 6 for Figure 4K/Uncropped Western blot images corresponding to Figure 4K.pdf]

Figure 4K

uncropped blots

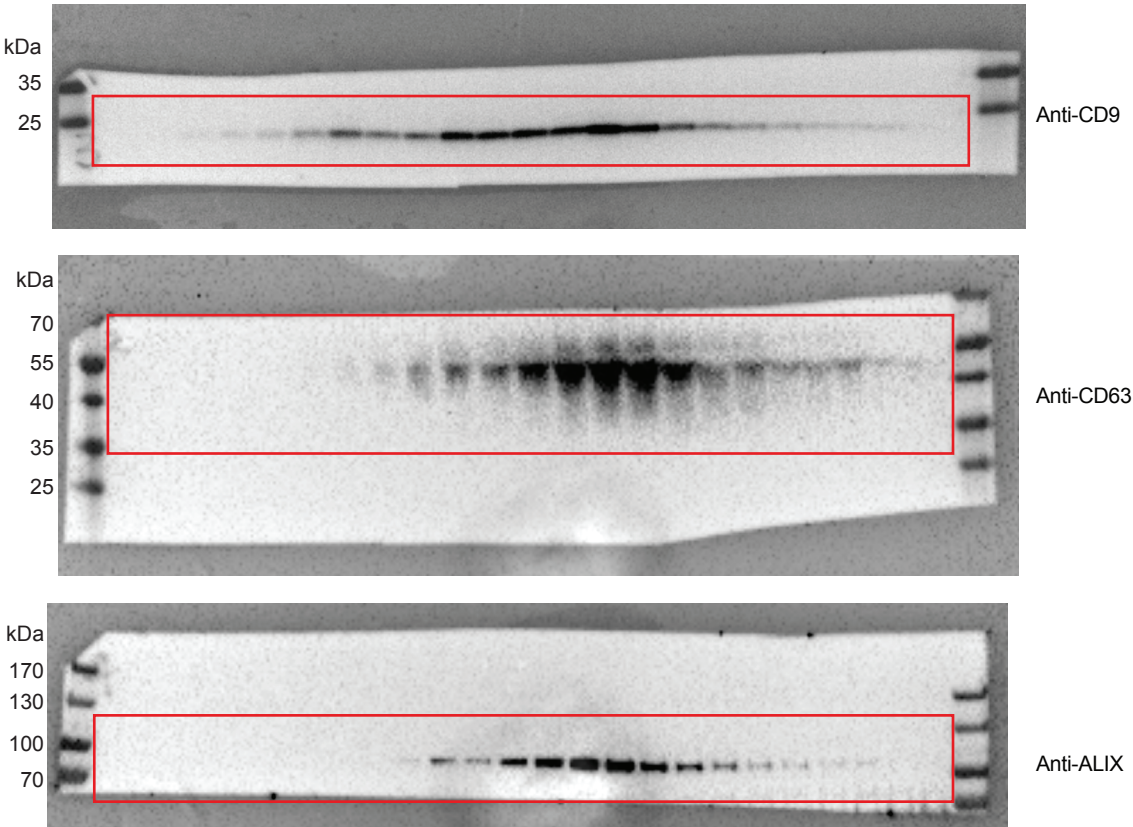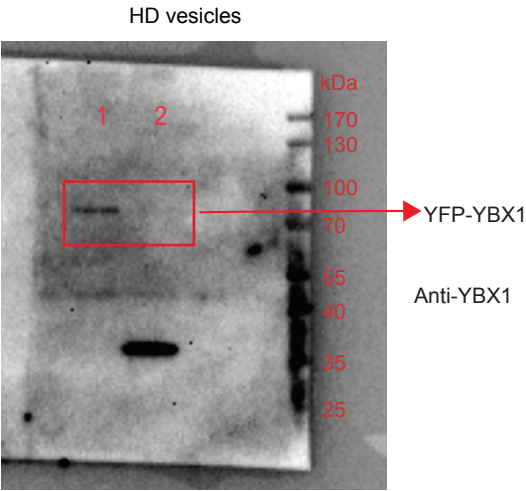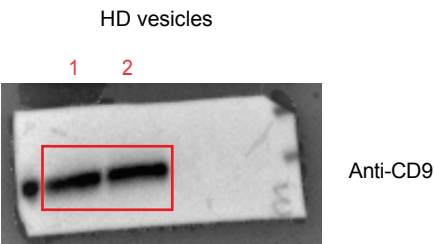

Lane 1:  $\Delta$ YBX1, YFP-YBX1-WT,  
Lane 2:  $\Delta$ YBX1, YFP-YBX1-F85A.

Lane 1 and Lane 2 were used in Figure 4K (right panel).

K

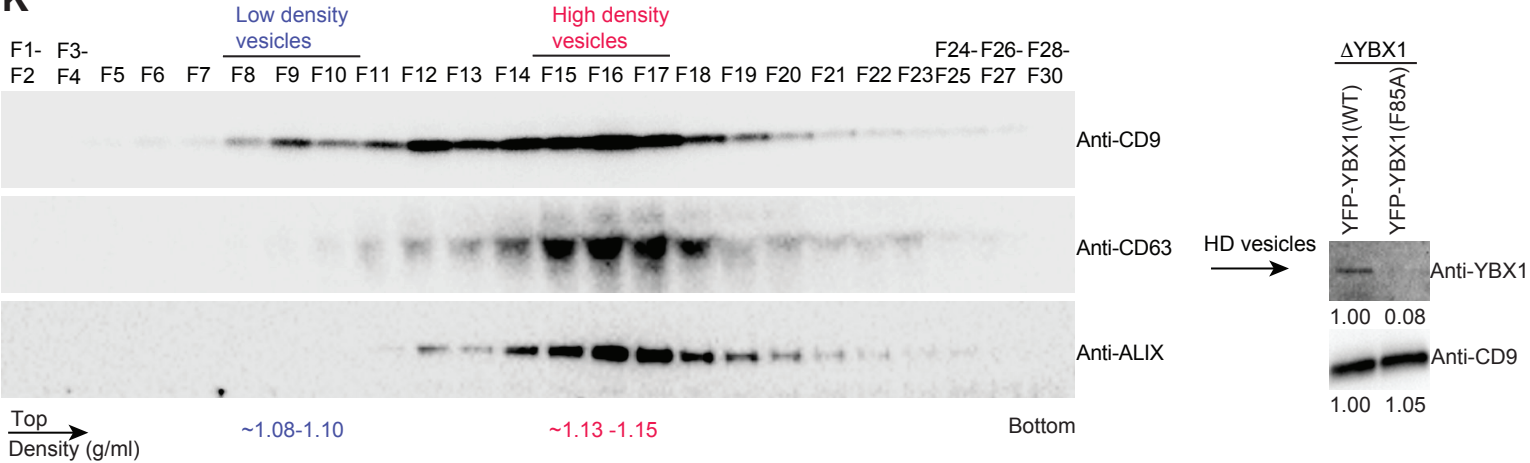

Figure 4K. Immunoblots across the iodixanol gradient for classical exosome markers CD9, CD63 and ALIX (the left panel) and YBX1 (the right panel).
