# Supplementary material for: Selective sorting of microRNAs into exosomes by phase-separated YBX1 condensates
Source: eLife journal article supplement (doi:10.7554/elife.71982), 2021-11-12
Supplement: fig5-data1 [file Uncropped Western blot images corresponding to Figure 5C.pdf › Figure 5-source data 1 for Figure 5C/Uncropped Western blot images corresponding to Figure 5C.pdf]

Figure 5C

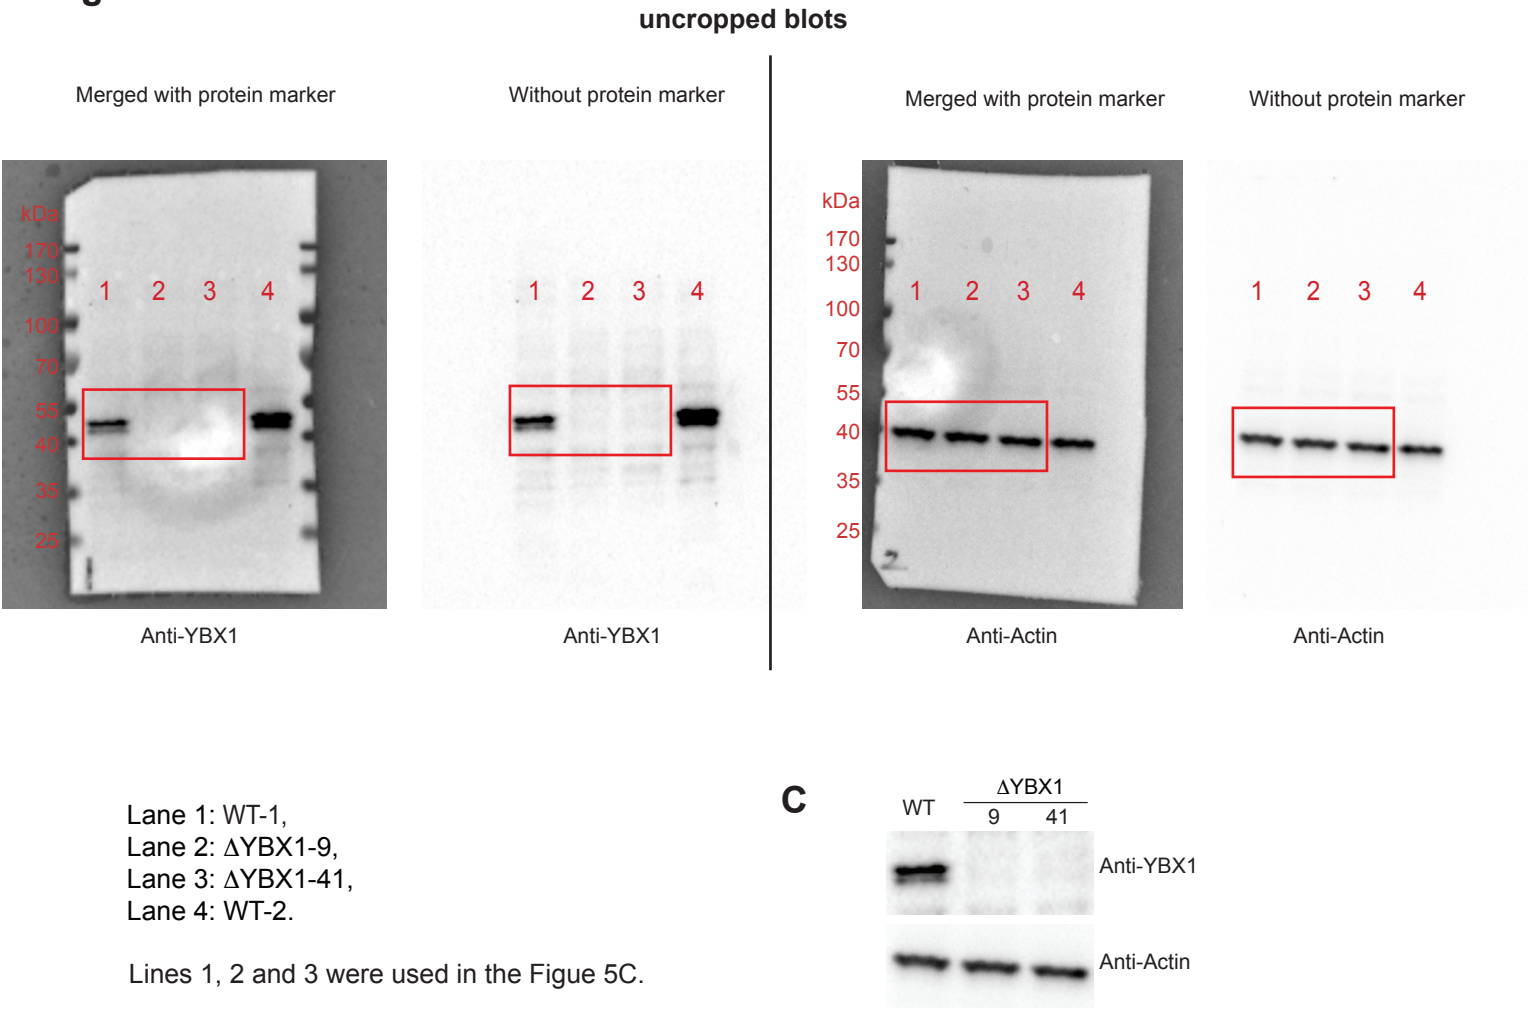

Figure 5C. Analysis of wild-type and CRISPR/Cas9 genome edited HEK293T clones by immunoblot for YBX1 (top) and actin (bottom).
