# Supplementary material for: Selective sorting of microRNAs into exosomes by phase-separated YBX1 condensates
Source: eLife journal article supplement (doi:10.7554/elife.71982), 2021-11-12
Supplement: fig7-data3 [file Uncropped Western blot images corresponding to Figure 7G.pdf › Figure 7-source data 3 for Figure 7G/Uncropped Western blot images corresponding to Figure 7G.pdf]

## Figure 7G

### uncropped blots

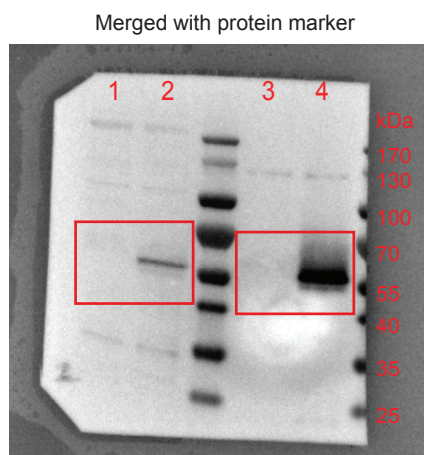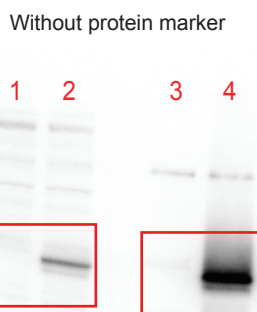

Lane 1: No tag, Input, anti-Flag  
 Lane 2: 3xFlag-YBX1, Input, anti-Flag  
 Lane 3: No tag, IP, anti-Flag  
 Lane 4: 3xFlag-YBX1, IP, anti-Flag

Anti-Flag

Merged with protein marker

Without protein marker

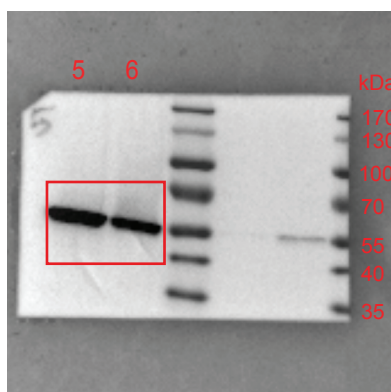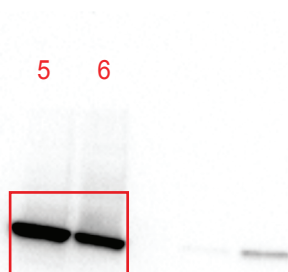

Anti-DDX6 for Input

Merged with protein marker

Without protein marker

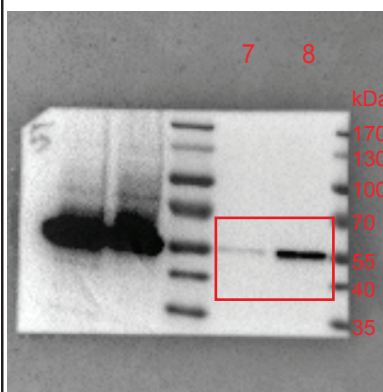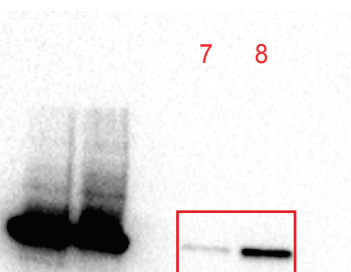

Anti-DDX6 for IP

Lane 5: No tag, Input, anti-DDX6  
 Lane 6: 3xFlag-YBX1, Input, anti-DDX6  
 Lane 7: No tag, IP, anti-DDX6  
 Lane 8: 3xFlag-YBX1, IP, anti-DDX6

Lane 1, 2, 3, 4, 5, 6, 7 and 8 were used in Figure 7G.

**G**

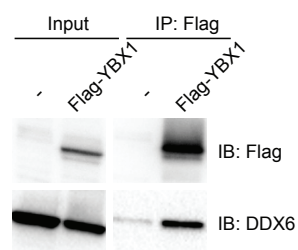

Figure 7G. Coimmunoprecipitation of DDX6 with YBX1.
