# Supplementary material for: Selective sorting of microRNAs into exosomes by phase-separated YBX1 condensates
Source: eLife journal article supplement (doi:10.7554/elife.71982), 2021-11-12
Supplement: fig7-data4 [file elife-71982-fig7-data4-v2.zip]

**Figure 7H**

**uncropped blots**

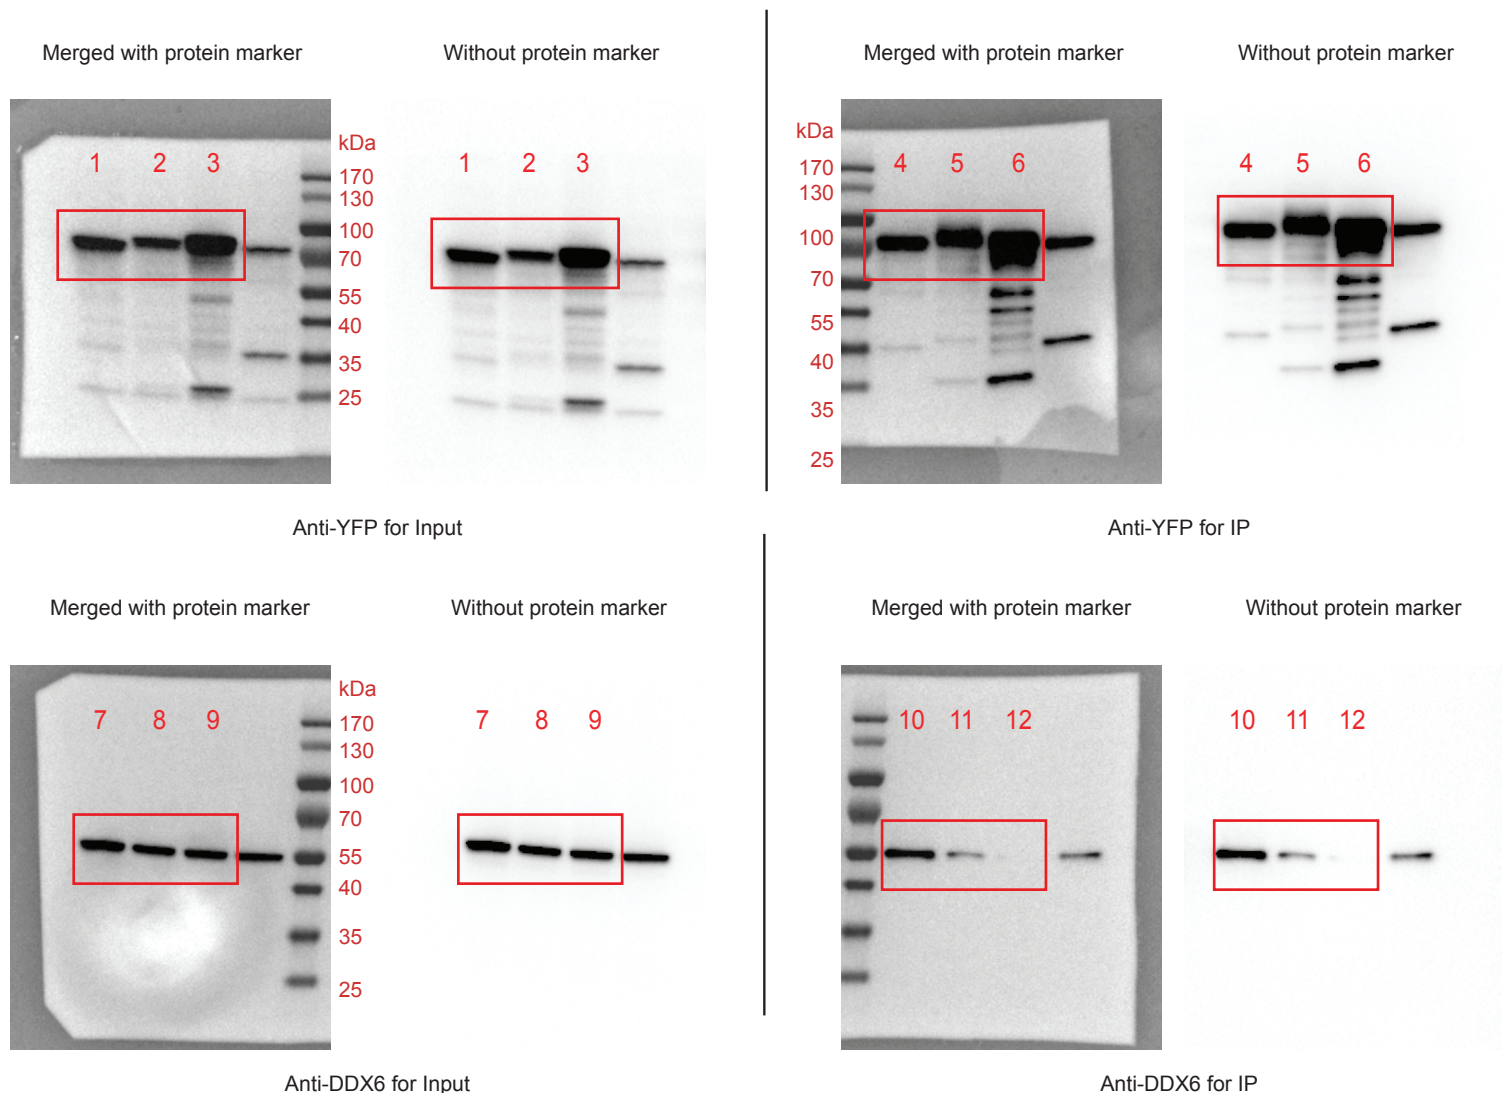

Lane 1:  $\Delta$ YBX1, YFP-YBX1-WT, Input, anti-YFP  
 Lane 2:  $\Delta$ YBX1, YFP-YBX1-LCD-Y to S, Input, anti-YFP  
 Lane 3:  $\Delta$ YBX1, YFP-YBX1-LCD-RK to G, Input, anti-YFP  
 Lane 4:  $\Delta$ YBX1, YFP-YBX1-WT, IP, anti-YFP  
 Lane 5:  $\Delta$ YBX1, YFP-YBX1-LCD-Y to S, IP, anti-YFP  
 Lane 6:  $\Delta$ YBX1, YFP-YBX1-LCD-RK to G, IP, anti-YFP

Lane 7:  $\Delta$ YBX1, YFP-YBX1-WT, Input, anti-DDX6  
 Lane 8:  $\Delta$ YBX1, YFP-YBX1-LCD-Y to S, Input, anti-DDX6  
 Lane 9:  $\Delta$ YBX1, YFP-YBX1-LCD-RK to G, Input, anti-DDX6  
 Lane 10:  $\Delta$ YBX1, YFP-YBX1-WT, IP, anti-DDX6  
 Lane 11:  $\Delta$ YBX1, YFP-YBX1-LCD-Y to S, IP, anti-DDX6  
 Lane 12:  $\Delta$ YBX1, YFP-YBX1-LCD-RK to G, IP, anti-DDX6

Lanes 1-12 were used in Fig 7H.

**H**

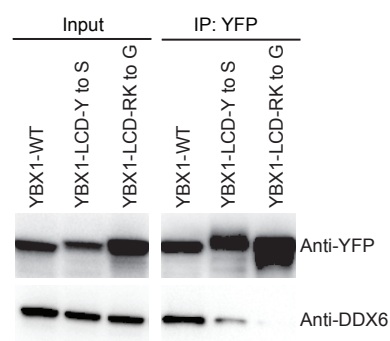

Figure 7H. Residues in YBX1-IDR that drive LLPS are required for its interaction with DDX6.
