# Supplementary material for: Selective sorting of microRNAs into exosomes by phase-separated YBX1 condensates
Source: eLife journal article supplement (doi:10.7554/elife.71982), 2021-11-12
Supplement: fig7-data5 [file Uncropped Western blot images corresponding to Figure 7I.pdf › Figure 7-source data 5 for Figure 7I/Uncropped Western blot images corresponding to Figure 7I.pdf]

**Figure 7I**

**uncropped blots**

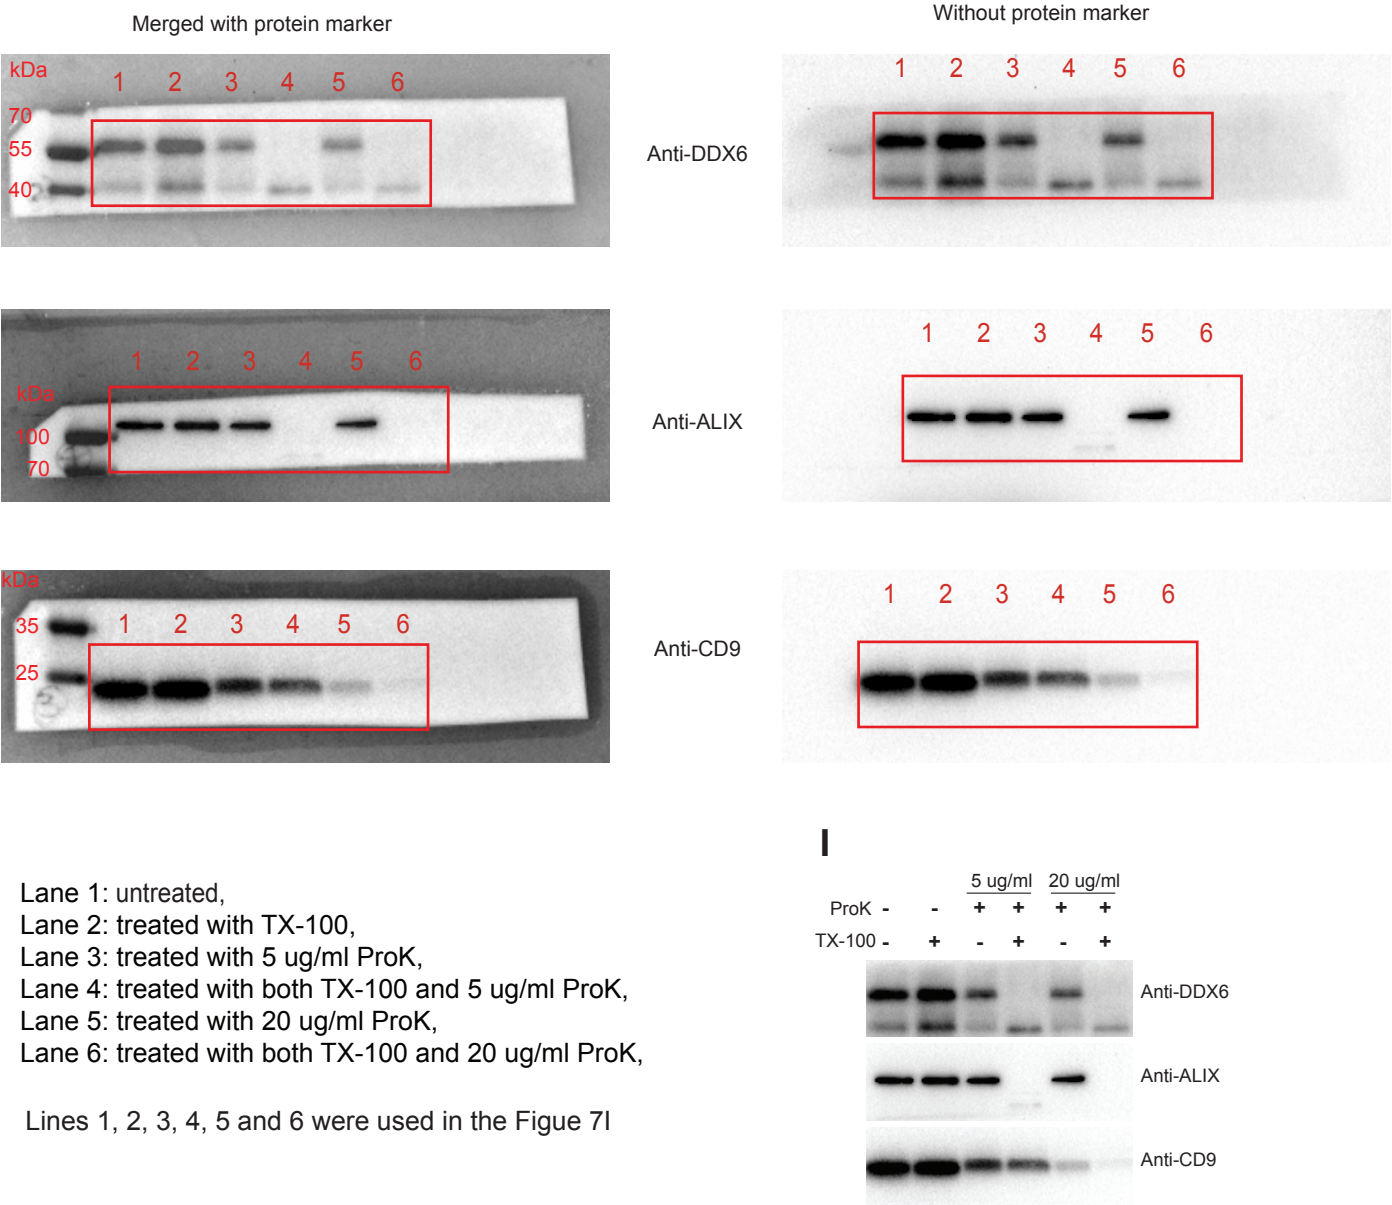

Figure 7I. Proteinase K protection assay for DDX6 using exosomes that were isolated by buoyant density flotation.
