# Supplementary material for: Selective sorting of microRNAs into exosomes by phase-separated YBX1 condensates
Source: eLife journal article supplement (doi:10.7554/elife.71982), 2021-11-12
Supplement: fig7-figsupp3-data1 [file elife-71982-fig7-figsupp3-data1-v2.zip]

Figure 7-supplement 3B

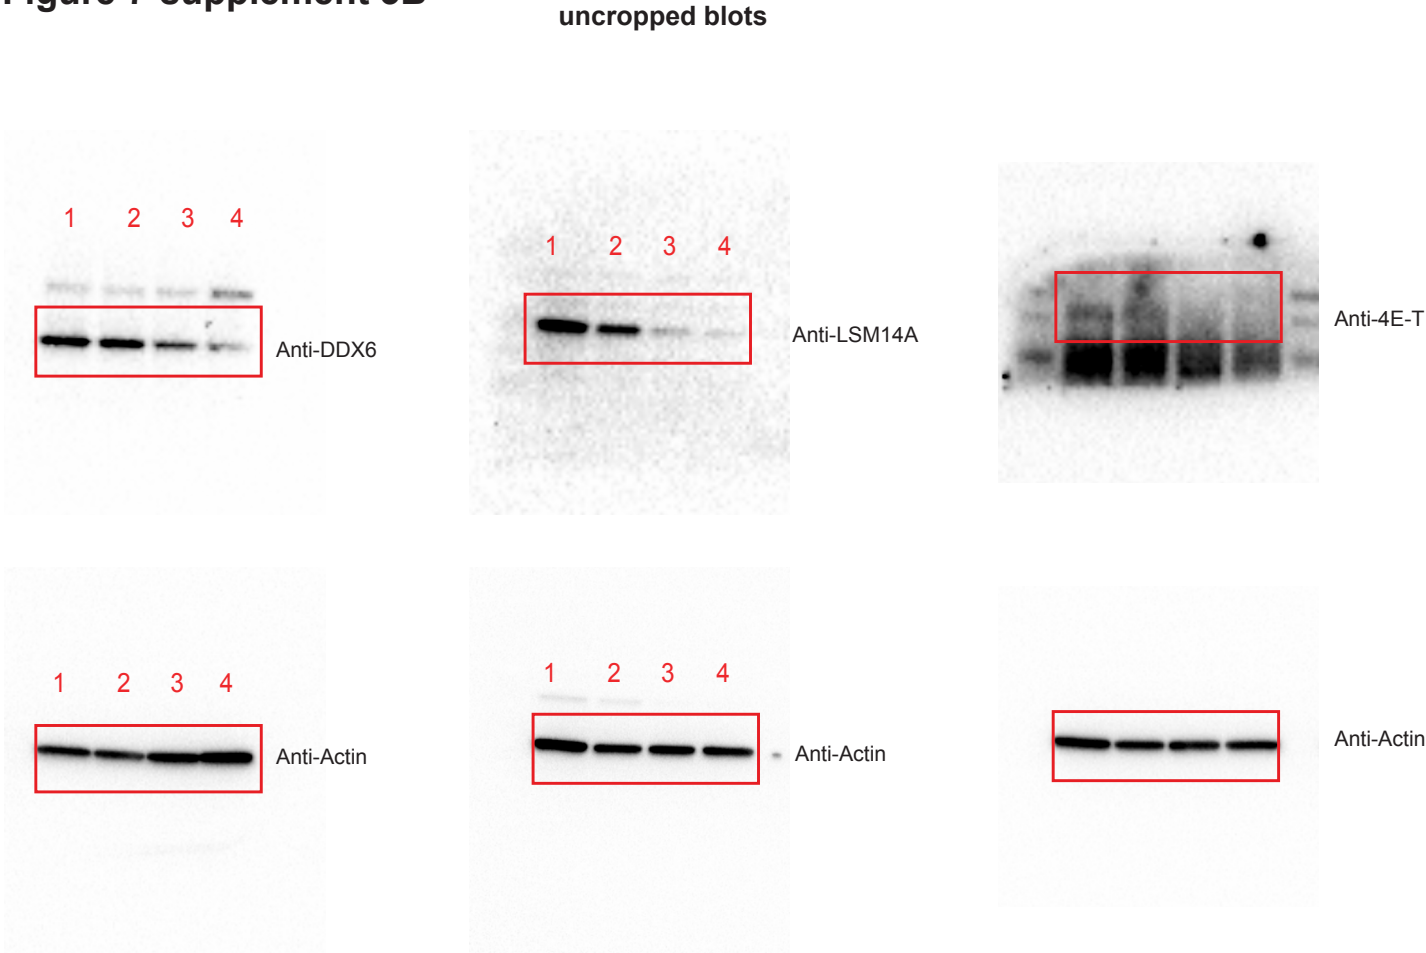

**B**

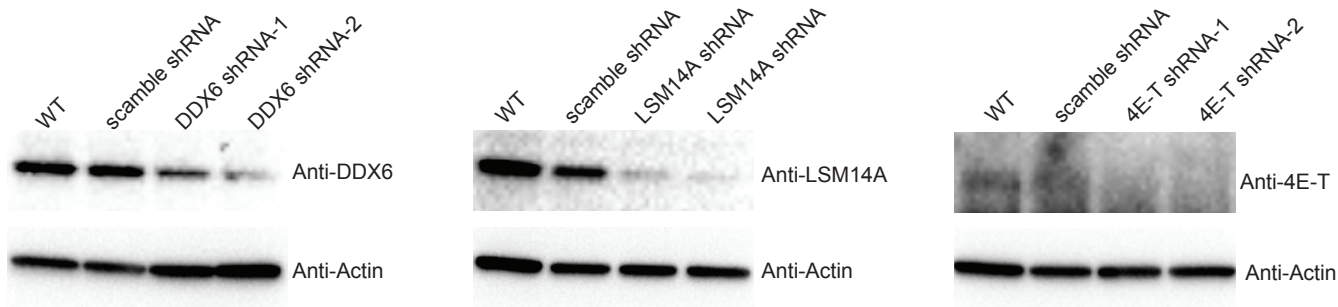

Figure 7-figure supplement 3. Effects of shRNA knockdown of selected P body proteins on miR-223 sorting into exosomes.
