# Supplementary material for: Selective sorting of microRNAs into exosomes by phase-separated YBX1 condensates
Source: eLife. 2021 Nov 12;10:e71982. doi: 10.7554/eLife.71982 (PMC8612733; doi:10.7554/eLife.71982)
Supplement: Figure 4—source data 4. [file elife-71982-fig4-data4.zip]

Archive with 17 entries (16 files):
- Figure 4-source data 4 for Figure 4F/
- Figure 4-source data 4 for Figure 4F/Figure 4F-raw unedited blot for Flotillin-2 merged with protein marker.tif
- __MACOSX/Figure 4-source data 4 for Figure 4F/._Figure 4F-raw unedited blot for Flotillin-2 merged with protein marker.tif
- Figure 4-source data 4 for Figure 4F/Figure 4F-raw unedited blot for YBX1.tif
- __MACOSX/Figure 4-source data 4 for Figure 4F/._Figure 4F-raw unedited blot for YBX1.tif
- Figure 4-source data 4 for Figure 4F/Figure 4F-raw unedited blot for CD9 merged with protein marker.tif
- __MACOSX/Figure 4-source data 4 for Figure 4F/._Figure 4F-raw unedited blot for CD9 merged with protein marker.tif
- Figure 4-source data 4 for Figure 4F/Figure 4F-raw unedited blot for ALIX without protein marker.tif
- __MACOSX/Figure 4-source data 4 for Figure 4F/._Figure 4F-raw unedited blot for ALIX without protein marker.tif
- Figure 4-source data 4 for Figure 4F/Figure 4F-raw unedited blot for CD9 without protein marker.tif
- __MACOSX/Figure 4-source data 4 for Figure 4F/._Figure 4F-raw unedited blot for CD9 without protein marker.tif
- Figure 4-source data 4 for Figure 4F/Figure 4F-raw unedited blot for ALIX merged with protein marker.tif
- __MACOSX/Figure 4-source data 4 for Figure 4F/._Figure 4F-raw unedited blot for ALIX merged with protein marker.tif
- Figure 4-source data 4 for Figure 4F/Uncropped Western blot images corresponding to Figure 4F.pdf
- __MACOSX/Figure 4-source data 4 for Figure 4F/._Uncropped Western blot images corresponding to Figure 4F.pdf
- Figure 4-source data 4 for Figure 4F/Figure 4F-raw unedited blot for Flotillin-2 without protein marker.tif
- __MACOSX/Figure 4-source data 4 for Figure 4F/._Figure 4F-raw unedited blot for Flotillin-2 without protein marker.tif
