# Supplementary material for: Selective sorting of microRNAs into exosomes by phase-separated YBX1 condensates
Source: eLife. 2021 Nov 12;10:e71982. doi: 10.7554/eLife.71982 (PMC8612733; doi:10.7554/eLife.71982)
Supplement: Figure 5—source data 2. [file elife-71982-fig5-data2.xlsx]

## Sheet: Sheet1
Numerical data that are represented as graphs in Figure 5
Figure 5A
	miR-223			miR-190			miR-144
293T	55.1668	119.817	53.7588	0.686927	1.41186	0.814091	276.876	868.147	365.796
U2OS	880.876	324.37	1498.77	0.401571	0.472241	0.528825	119.881	305.719	305.458
Figure 5B
	293T	U2OS
	1.88422	5.24085
	1.36705	3.12817
	1.95857	4.12702
Figure 5D
	Cells			Exosomes
293T-YB1KO	1.72987	1.27469	1.40088	0.793499	0.681491	0.48612
U2OS-YB1KO	1.86228	1.97602		0.622509	0.424529
Figure 5E and Figure 6-supplement 3
	Cells			Exosomes
YBX1-F85A, miR-223	1.2158	1.32207	1.84144	0.460892	0.528998	0.497637
YBX1-Y to S, miR-223	1.54785	1.727	1.25806	0.423006	0.479266	0.501585
YBX1-RK to G, miR-223	1.93406	1.95979	1.70377	0.786299	0.722966	0.687437
YBX1-F85A, miR-190	0.867278	1.0787	1.01363	0.660654	0.551844	0.572812
YBX1-Y to S, miR-190	1.24186	1.70503	1.62124	0.914169	0.868421	0.964576
YBX1-RK to G, miR-190	0.996356	1.28631	1.2216	0.954378	1.00333	1.07224
YBX1-F85A, miR-144	0.828917	0.865847	0.991923	0.818498	0.934349	0.879507
YBX1-Y to S, miR-144	0.76755	0.96014	0.803442	0.735476	0.86812	0.948684
YBX1-RK to G, miR-144	0.853226	1.15702	1.15738	1.00867	1.04324	1.19403
