# Supplementary material for: Selective sorting of microRNAs into exosomes by phase-separated YBX1 condensates
Source: eLife. 2021 Nov 12;10:e71982. doi: 10.7554/eLife.71982 (PMC8612733; doi:10.7554/eLife.71982)
Supplement: Figure 6—source data 1. [file elife-71982-fig6-data1.xlsx]

## Sheet: Sheet1
Numerical data that are represented as graphs in Figure 6
Figure 6C
	Protein			miR-223
YBX1-WT	0.0608	0.06548	0.07216	0.03124	0.05055	0.0545
YBX1-F85A	0.06767	0.06457	0.07785	0	0	2e-05
YBX1-CTD-Y to S	0.00207	0.00011	1.775e-06	0.01698	0.00877	0.00731
YBX1-CTD-RK to G	0	0	0	0	0	0
Figure 6E
	Protein			miRNAs
miR-223	0.05596	0.10908	0.08777	0.0496	0.0487	0.04618
miR-190	0.06847	0.06938	0.1227	0.01043	0.01718	0.02337
miR-144	0.07797	0.05434	0.11683	0.00291	0.0044	0.00291
Figure 6F
	miR-223			miR-190			miR-144
YBX1-WT	92.608	97.1314	62.0833	7.55273	8.2308	7.73275	10.5215	12.8515	11.3698
Figure 6I
	Protein			miRNAs
miR-223	0.01253	0.01197	0.00888	0.01851	0.01755	0.01217
miR-190	0.01402	0.01132	0.00632	0.0007	7e-05	0
miR-144	0.0104	0.01701	0.01986	0.00066	0.00048	0
Figure 6J
	Cells			Exosomes
YB1KO, miR-223	1.40088	1.25466	1.26898	0.48612	0.581883	0.731806
YB1KO, miR-190	0.940435	1.14406	1.1067	1.1071	1.16623	1.05756
YB1KO, miR-144	1.14075	0.90369	1.04078	1.07253	1.13577	1.13995
