# Supplementary material for: Selective sorting of microRNAs into exosomes by phase-separated YBX1 condensates
Source: eLife. 2021 Nov 12;10:e71982. doi: 10.7554/eLife.71982 (PMC8612733; doi:10.7554/eLife.71982)
Supplement: Figure 7—figure supplement 3—source data 1. [file elife-71982-fig7-figsupp3-data1.zip]

Archive with 18 entries (17 files):
- Figure 7-supplement 3-source data 1/
- __MACOSX/._Figure 7-supplement 3-source data 1
- Figure 7-supplement 3-source data 1/.DS_Store
- __MACOSX/Figure 7-supplement 3-source data 1/._.DS_Store
- Figure 7-supplement 3-source data 1/unedited blot for LSM14A.tif
- __MACOSX/Figure 7-supplement 3-source data 1/._unedited blot for LSM14A.tif
- Figure 7-supplement 3-source data 1/unedited blot for actin related to 4E-T.tif
- __MACOSX/Figure 7-supplement 3-source data 1/._unedited blot for actin related to 4E-T.tif
- Figure 7-supplement 3-source data 1/unedited blot for DDX6.tif
- __MACOSX/Figure 7-supplement 3-source data 1/._unedited blot for DDX6.tif
- Figure 7-supplement 3-source data 1/unedited blot for Actin related to LSM14A.tif
- __MACOSX/Figure 7-supplement 3-source data 1/._unedited blot for Actin related to LSM14A.tif
- Figure 7-supplement 3-source data 1/Uncropped Western blot images corresponding to Figure 7-supplement 3.pdf
- __MACOSX/Figure 7-supplement 3-source data 1/._Uncropped Western blot images corresponding to Figure 7-supplement 3.pdf
- Figure 7-supplement 3-source data 1/unedited blot for Actin related to DDX6.tif
- __MACOSX/Figure 7-supplement 3-source data 1/._unedited blot for Actin related to DDX6.tif
- Figure 7-supplement 3-source data 1/unedited blot for 4E-T.tif
- __MACOSX/Figure 7-supplement 3-source data 1/._unedited blot for 4E-T.tif
