# Supplementary material for: Selective sorting of microRNAs into exosomes by phase-separated YBX1 condensates
Source: eLife. 2021 Nov 12;10:e71982. doi: 10.7554/eLife.71982 (PMC8612733; doi:10.7554/eLife.71982)
Supplement: Figure 7—source data 4. [file elife-71982-fig7-data4.zip]

Archive with 19 entries (18 files):
- Figure 7-source data 4 for Figure 7H/
- Figure 7-source data 4 for Figure 7H/Figure 7H-unmodified blot for DDX6-Input merged with protein marker.tif
- __MACOSX/Figure 7-source data 4 for Figure 7H/._Figure 7H-unmodified blot for DDX6-Input merged with protein marker.tif
- Figure 7-source data 4 for Figure 7H/Figure 7H-unmodified blot for DDX6-Input without protein marker.tif
- __MACOSX/Figure 7-source data 4 for Figure 7H/._Figure 7H-unmodified blot for DDX6-Input without protein marker.tif
- Figure 7-source data 4 for Figure 7H/Figure 7H-unmodified blot for YFP-Input merged with protein marker.tif
- __MACOSX/Figure 7-source data 4 for Figure 7H/._Figure 7H-unmodified blot for YFP-Input merged with protein marker.tif
- Figure 7-source data 4 for Figure 7H/Figure 7H-unmodified blot for DDX6-IP without protein marker.tif
- __MACOSX/Figure 7-source data 4 for Figure 7H/._Figure 7H-unmodified blot for DDX6-IP without protein marker.tif
- Figure 7-source data 4 for Figure 7H/Figure 7H-unmodified blot for YFP-IP merged with protein marker.tif
- __MACOSX/Figure 7-source data 4 for Figure 7H/._Figure 7H-unmodified blot for YFP-IP merged with protein marker.tif
- Figure 7-source data 4 for Figure 7H/Figure 7H-unmodified blot for YFP-Input without protein marker.tif
- __MACOSX/Figure 7-source data 4 for Figure 7H/._Figure 7H-unmodified blot for YFP-Input without protein marker.tif
- Figure 7-source data 4 for Figure 7H/Uncropped Western blot images corresponding to Figure 7H.pdf
- __MACOSX/Figure 7-source data 4 for Figure 7H/._Uncropped Western blot images corresponding to Figure 7H.pdf
- Figure 7-source data 4 for Figure 7H/Figure 7H-unmodified blot for DDX6-IP merged with protein marker.tif
- __MACOSX/Figure 7-source data 4 for Figure 7H/._Figure 7H-unmodified blot for DDX6-IP merged with protein marker.tif
- Figure 7-source data 4 for Figure 7H/Figure 7H-unmodified blot for YFP-IP without protein marker.tif
- __MACOSX/Figure 7-source data 4 for Figure 7H/._Figure 7H-unmodified blot for YFP-IP without protein marker.tif
