# Supplementary figures and images for: Selective sorting of microRNAs into exosomes by phase-separated YBX1 condensates
Source: eLife journal article supplement (doi:10.7554/elife.71982), 2021-11-12

Figure 4C uncropped blots

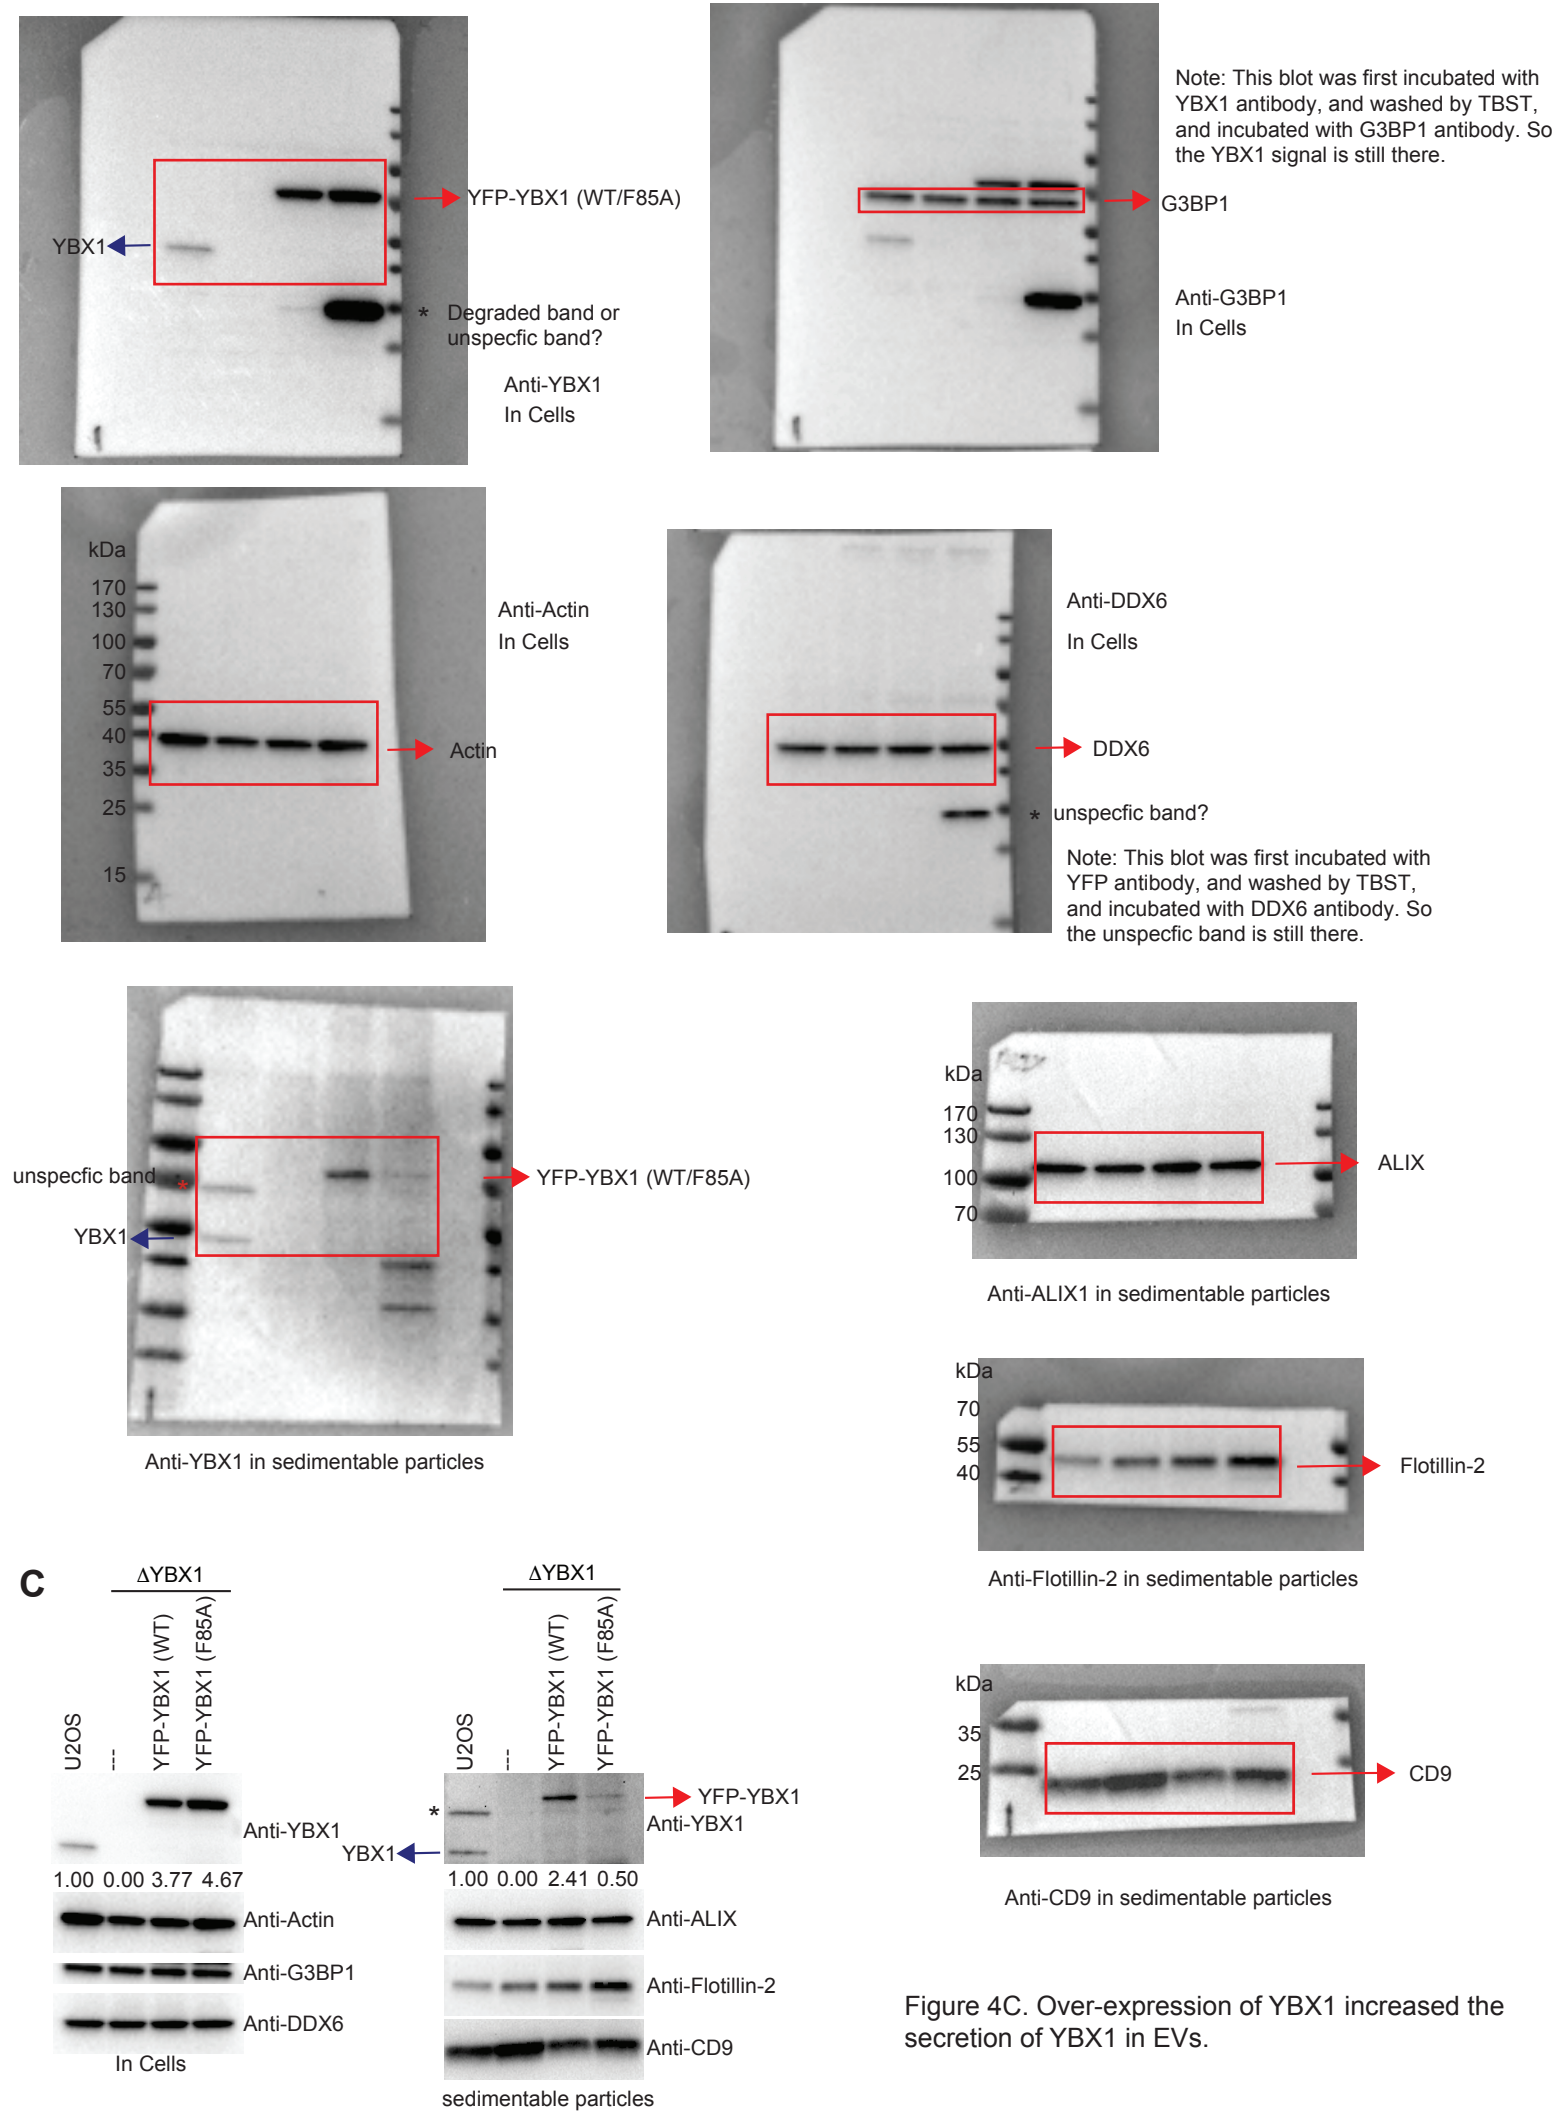

Supplement: fig4-data1 [file elife-71982-fig4-data1-v2.zip]

Figure 4I

uncropped blots

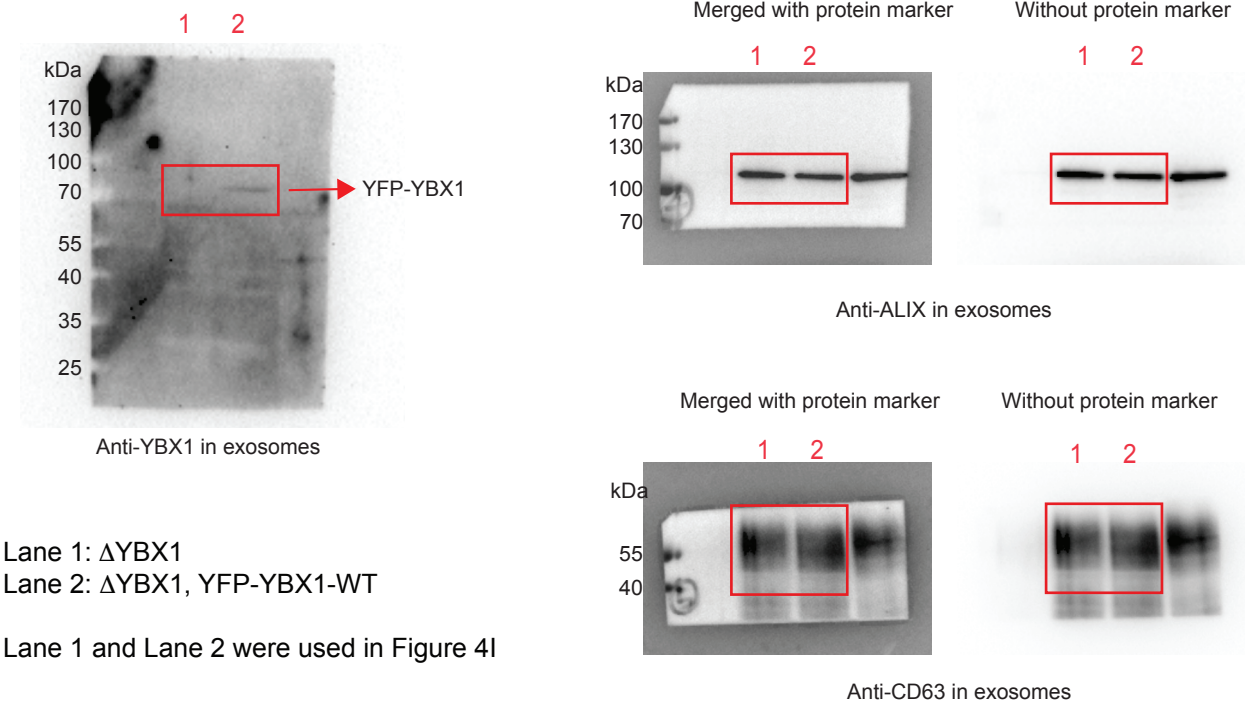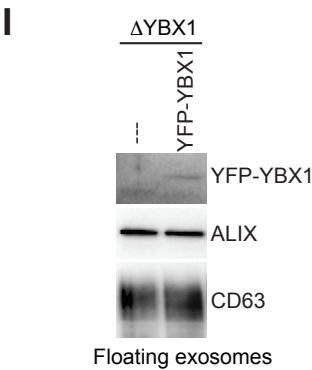

Figure 4I. YFP-YBX1 detected in sucrose post-flotation fraction.

Supplement: fig4-data5 [file Uncropped Western blot images corresponding to Figure 4I.pdf › Figure 4-source data 5 for Figure 4I/Uncropped Western blot images corresponding to Figure 4I.pdf]
